# Supplementary material for: Application of a risk-guided strategy to secondary prevention of coronary heart disease: analysis from a state-wide data linkage in Queensland, Australia
Source: HighWire-hosted journal article supplement (doi:10.1136/bmjopen-2021-057856), 2022-05-01
Supplement: bmjopen-2021-057856supp001_data_supplement.pdf [file bmjopen-2021-057856supp001_data_supplement.pdf]

**Supplementary Table 1.** Commonly used cardio-protective medications and their maximum dose

|                      |                      | Max dose |
|----------------------|----------------------|----------|
| <b>Beta-blockers</b> | Bisoprolol           | 10mg     |
|                      | Nebivolol            | 10mg     |
|                      | Metoprolol succinate | 200mg    |
|                      | Metoprolol tartrate  | 180mg    |
|                      | Carvedilol           | 100mg    |
|                      | Atenolol             | 100mg    |
|                      | Sotalol              | 320mg    |
|                      | Propranolol          | 320mg    |
|                      | Labetalol            | 2400mg   |
|                      | Oxprenolol           | 320mg    |
| <b>ACEI/ARB</b>      | Pindolol             | 60mg     |
|                      | Ramipril             | 10mg     |
|                      | perindopril          | 16mg     |
|                      | Lisinopril           | 40mg     |
|                      | Irbesartan           | 300mg    |
|                      | Valsartan            | 320mg    |
|                      | Telmisartan          | 80mg     |
|                      | Losartan             | 100mg    |
| <b>Statins</b>       | Candesartan          | 32mg     |
|                      | Simvastatin          | 80mg     |
|                      | Atorvastatin         | 80mg     |
|                      | Rosuvastatin         | 40mg     |
|                      | Fluvastatin          | 80mg     |
|                      | Lovastatin           | 80mg     |
|                      | Pitavastatin         | 4mg      |
| Pravastatin          | 80mg                 |          |
